# Supplementary material for: Comparison of video-stylet and conventional laryngoscope for endotracheal intubation in adults with cervical spine immobilization: A PRISMA-compliant meta-analysis
Source: PubMed Central journal article supplement — Medicine (Baltimore). 2022 Aug 19;101(33):e30032. doi: 10.1097/MD.0000000000030032 (PMC9387965; doi:10.1097/md.0000000000030032), 2022-08-19
Supplement: medi-101-e30032-s001.pdf [file medi-101-e30032-s001.pdf]

**Supplemental Table 1. PICOS and search strategies**

|                     |                                                                                                   |
|---------------------|---------------------------------------------------------------------------------------------------|
| <b>Question:</b>    | Do the use of video-stylets improve the intubation outcomes in patients with neck immobilization? |
| <b>Population</b>   | Patients with neck immobilization                                                                 |
| <b>Intervention</b> | Video-stylets as the intervention                                                                 |
| <b>Comparison</b>   | Direct laryngoscopy as the control                                                                |
| <b>Outcome</b>      | Intubation outcomes such as successful first-attempt intubation rate                              |
| <b>Studies</b>      | Randomized Controlled Trial                                                                       |

**Ovid MEDLINE**

|   |                                                                                                                                                                                                                                        |        |
|---|----------------------------------------------------------------------------------------------------------------------------------------------------------------------------------------------------------------------------------------|--------|
| 1 | ((("cervical spine" adj4 (instability or stabilization or injury or immobilization or trauma)) or "neck collar" or "collar" or "cervical spine stabilization maneuvers" or "manual inline stabilization" or "cervical adj4 spine").mp. | 12352  |
| 2 | ("Trachway" or "video stylet" or "Clarus Video System" or "optiscope" or "optical stylet" or "Shikani Optical Stylet" or "shikani" or "bonfils" or "Bonfils fiberscope" or "StyletScope" or "Levitan FPS" or "InnoScope").mp.          | 248    |
| 3 | ("Macintosh laryngoscop*" or "Laryngoscop*" or "ML" or "Miller" or "McCoy" or "conventional laryngoscopy" or "Direct Laryngoscopy").mp.                                                                                                | 826068 |
| 4 | 1 and 2 and 3                                                                                                                                                                                                                          | 19     |
| 5 | 4 and (((randomized controlled trial or controlled clinical trial).pt. or randomi*ed.ab. or placebo.ab. or drug therapy.fs. or randomly.ab. or trial.ab. or groups.ab.) not (exp animals/ not humans.sh.))                             | 13     |
