# Supplementary material for: Comparison of video-stylet and conventional laryngoscope for endotracheal intubation in adults with cervical spine immobilization: A PRISMA-compliant meta-analysis
Source: PubMed Central journal article supplement — Medicine (Baltimore). 2022 Aug 19;101(33):e30032. doi: 10.1097/MD.0000000000030032 (PMC9387965; doi:10.1097/md.0000000000030032), 2022-08-19
Supplement: medi-101-e30032-s003.pdf [file medi-101-e30032-s003.pdf]

**Supplemental Table 2. Risk of bias of included studies**

| <b>Study Name: Abdullah 2013</b>       |                           |                                                                                                                                                     |
|----------------------------------------|---------------------------|-----------------------------------------------------------------------------------------------------------------------------------------------------|
| <b>Bias</b>                            | <b>Authors' judgement</b> | <b>Support for judgement</b>                                                                                                                        |
| Random sequence generation             | Low risk                  | Randomization was done via a computer-generated list.                                                                                               |
| Allocation concealment                 | Low risk                  | The sequence concealed in individual opaque envelopes.                                                                                              |
| Blinding of participants and personnel | High risk                 | Investigators were not blinded to allocation due to their participation in the intubation process.                                                  |
| Blinding of outcome assessment         | High risk                 | Investigators were not blinded to allocation due to their participation in the intubation process.                                                  |
| Incomplete outcome data                | Low risk                  | Among the 60 patients initially included in the study, no patient was excluded from the study.                                                      |
| Selective reporting                    | Uncertain risk            | Information regarding registration identifier was not mentioned. Information regarding primary and secondary outcomes were available in this study. |
| Other bias                             | Low risk                  | The authors have no funding, financial relationship, or conflicts of interest to disclose.                                                          |

**Study Name: Byhahn 2008**

| <b>Bias</b>                            | <b>Authors' judgement</b> | <b>Support for judgement</b>                                                                                                                                                                                                                                                                  |
|----------------------------------------|---------------------------|-----------------------------------------------------------------------------------------------------------------------------------------------------------------------------------------------------------------------------------------------------------------------------------------------|
| Random sequence generation             | Low risk                  | Patients were randomly allocated to one of two groups, and randomization was established by simple shuffling of the envelopes.                                                                                                                                                                |
| Allocation concealment                 | Low risk                  | Allocation concealment was achieved with the use of coded, sealed, opaque envelopes.                                                                                                                                                                                                          |
| Blinding of participants and personnel | High risk                 | The physician who performed the tracheal intubation was not blinded to the airway device being used.                                                                                                                                                                                          |
| Blinding of outcome assessment         | High risk                 | The physician who performed the tracheal intubation was not blinded to the airway device being used.                                                                                                                                                                                          |
| Incomplete outcome data                | Low risk                  | All participants completed the study and their data were analyzed for the primary outcome according to their original group allocation, with no missing data.                                                                                                                                 |
| Selective reporting                    | Uncertain risk            | Information regarding registration identifier was not mentioned. Information regarding primary and secondary outcomes were available in this study.                                                                                                                                           |
| Other bias                             | Uncertain risk            | The Bonfils intubation fibrescopes were provided on a complimentary basis by Karl Storz GmbH and Co. KG, Tuttlingen, Germany. There were no other sources of funding. None of the authors has any conflicts of interest related to the products and/or companies mentioned in the manuscript. |

**Study Name: Gupta 2015**

| <b>Bias</b>                            | <b>Authors' judgement</b> | <b>Support for judgement</b>                                                                                                                                                                                                                              |
|----------------------------------------|---------------------------|-----------------------------------------------------------------------------------------------------------------------------------------------------------------------------------------------------------------------------------------------------------|
| Random sequence generation             | Low risk                  | The patients were then randomly allocated to either the Bonfils intubation fibrescope or to left molar laryngoscopy (Macintosh laryngoscope size 3) using computer generated codes that were maintained in sequentially numbered sealed opaque envelopes. |
| Allocation concealment                 | Low risk                  | The patients were then randomly allocated to either the Bonfils intubation fibrescope or to left molar laryngoscopy (Macintosh laryngoscope size 3) using computer generated codes that were maintained in sequentially numbered sealed opaque envelopes. |
| Blinding of participants and personnel | High risk                 | The physician who performed the tracheal intubation was not blinded to the airway device being used.                                                                                                                                                      |
| Blinding of outcome assessment         | Uncertain risk            | No specific statement                                                                                                                                                                                                                                     |
| Incomplete outcome data                | Low risk                  | Among the 120 patients initially included in the study, 5 patients were excluded from the study.                                                                                                                                                          |
| Selective reporting                    | Uncertain risk            | Information regarding registration identifier was not mentioned.                                                                                                                                                                                          |
| Other bias                             | Low risk                  | The authors have no funding, financial relationship, or conflicts of interest to disclose.                                                                                                                                                                |

**Study Name: Kok 2012**

| <b>Bias</b>                            | <b>Authors' judgement</b> | <b>Support for judgement</b>                                                                                                                                       |
|----------------------------------------|---------------------------|--------------------------------------------------------------------------------------------------------------------------------------------------------------------|
| Random sequence generation             | Low risk                  | In this crossover study, the randomized laryngoscopy sequence (i.e., Macintosh/LFS or LFS/Macintosh) was determined by a computer-generated list without blocking. |
| Allocation concealment                 | Low risk                  | The results were placed in sealed opaque envelopes and opened after induction of anesthesia by the research coordinator.                                           |
| Blinding of participants and personnel | High risk                 | The operators were not blinded to the intubation devices                                                                                                           |
| Blinding of outcome assessment         | High risk                 | No specific statement                                                                                                                                              |
| Incomplete outcome data                | Low risk                  | Among 94 patients, only three patients were not included for analysis.                                                                                             |
| Selective reporting                    | Uncertain risk            | Information regarding registration identifier was not available in this study.                                                                                     |
| Other bias                             | Low risk                  | The authors have no funding, financial relationship, or conflicts of interest to disclose.                                                                         |

**Study Name: Turkstra 2007**

| <b>Bias</b>                            | <b>Authors' judgement</b> | <b>Support for judgement</b>                                                                                                                                                                                                                                                                                                                                 |
|----------------------------------------|---------------------------|--------------------------------------------------------------------------------------------------------------------------------------------------------------------------------------------------------------------------------------------------------------------------------------------------------------------------------------------------------------|
| Random sequence generation             | Low risk                  | A sealed envelope containing a computer-generated random assignment was opened, assigning patients to both groups. Block randomization was used to ensure an equal number of patients in each group.                                                                                                                                                         |
| Allocation concealment                 | Low risk                  | A sealed envelope containing a computer-generated random assignment was opened, assigning patients to both groups.                                                                                                                                                                                                                                           |
| Blinding of participants and personnel | High risk                 | The operators were not blinded to the intubation devices                                                                                                                                                                                                                                                                                                     |
| Blinding of outcome assessment         | Low risk                  | The fluoroscopy video monitor was not visible to the laryngoscopist during the study.                                                                                                                                                                                                                                                                        |
| Incomplete outcome data                | Low risk                  | Twenty-four eligible patients agreed to participate and received their allocated intervention, and one patient was excluded from the study.                                                                                                                                                                                                                  |
| Selective reporting                    | Low risk                  | This trial was registered at clinicaltrial.gov (registration identifier: NCT00310999). Information regarding primary and secondary outcomes were available in this study.                                                                                                                                                                                    |
| Other bias                             | Low risk                  | The authors have no conflicts of interest with the manufacturers of any of the medical devices used in this study. The Shikani Optical Stylet for this trial was provided on loan from Clarus Medical Inc. for the duration of the trial. Clarus Medical Inc. had no input with respect to study design or data analysis, and provided no financial support. |
