# Supplementary material for: Comparison of video-stylet and conventional laryngoscope for endotracheal intubation in adults with cervical spine immobilization: A PRISMA-compliant meta-analysis
Source: PubMed Central journal article supplement — Medicine (Baltimore). 2022 Aug 19;101(33):e30032. doi: 10.1097/MD.0000000000030032 (PMC9387965; doi:10.1097/md.0000000000030032), 2022-08-19

**Supplementary Figure 2.** Forest plot comparing the risk of tissue damage between video-stylet and laryngoscope groups. CI, confidence interval; RR, risk ratio; M-H, Mantel–Haenszel.

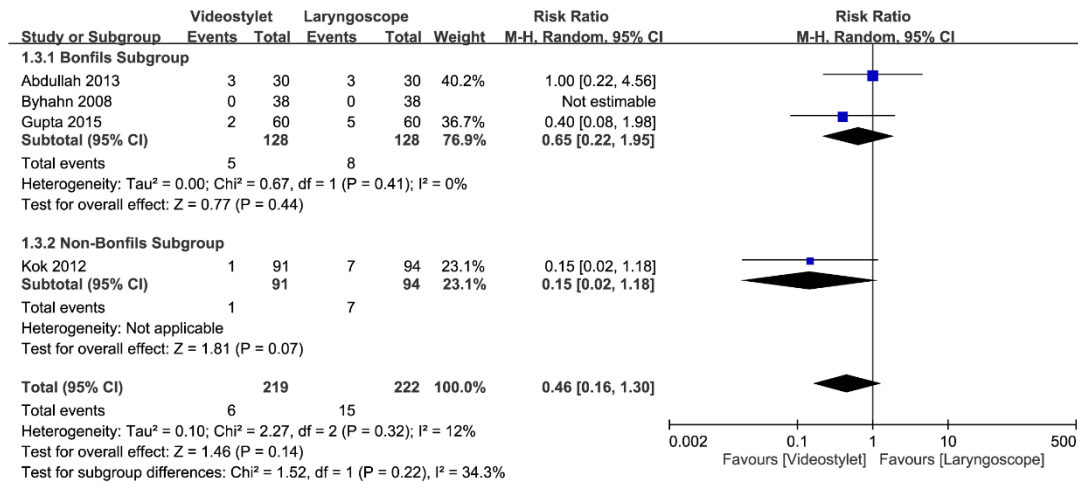

Supplement: medi-101-e30032-s004.pdf [file medi-101-e30032-s004.pdf]
